# Supplementary material for: Time–strain inseparability in multiaxial stress relaxation of supramolecular gels formed via host–guest interactions
Source: Royal Society of Chemistry journal article supplement (doi:10.1039/d2sm00285j), 2022-01-01
Supplement: d2sm00285j1.pdf [file d2sm00285j1.pdf]

## Supporting Information

### Time-Strain Inseparability in Multiaxial Stress Relaxation of Supramolecular Gels Formed by Host–Guest Interaction

Takuro Kimura,<sup>†</sup> Takuma Aoyama,<sup>†</sup> Masaki Nakahata,<sup>††</sup> Yoshinori Takashima,<sup>¶</sup> Motomu  
Tanaka,<sup>‡</sup> Akira Harada,<sup>§</sup> and Kenji Urayama<sup>†, ⊥, \*</sup>

<sup>†</sup> *Department of Macromolecular Science and Engineering, Kyoto Institute of Technology,  
Sakyo-ku, Kyoto 606-8585, Japan*

<sup>††</sup> *Department of Materials Engineering Science, Graduate School of Engineering Science,  
Osaka University, 560-8531 Osaka, Japan*

<sup>¶</sup> *Institute for Advanced Co-Creation Studies, Osaka University, Suita, Osaka 565-0871, Japan*

<sup>‡</sup> *Center for Integrative Medicine and Physics, Institute for Advanced Study, Kyoto University,  
606-8501 Kyoto, Japan; Physical Chemistry of Biosystems, Institute of Physical Chemistry,  
Heidelberg University, D69120 Heidelberg, Germany*

<sup>§</sup> *The Institute of Scientific and Industrial Research, Osaka University, Ibaraki, Osaka 567-0047,  
Japan*

<sup>⊥</sup> *Department of Material Chemistry, Graduate School of Engineering, Kyoto University, 615-  
8510 Kyoto, Japan*

\*To whom correspondence should be addressed: [urayama@kit.ac.jp](mailto:urayama@kit.ac.jp) (K.U.)

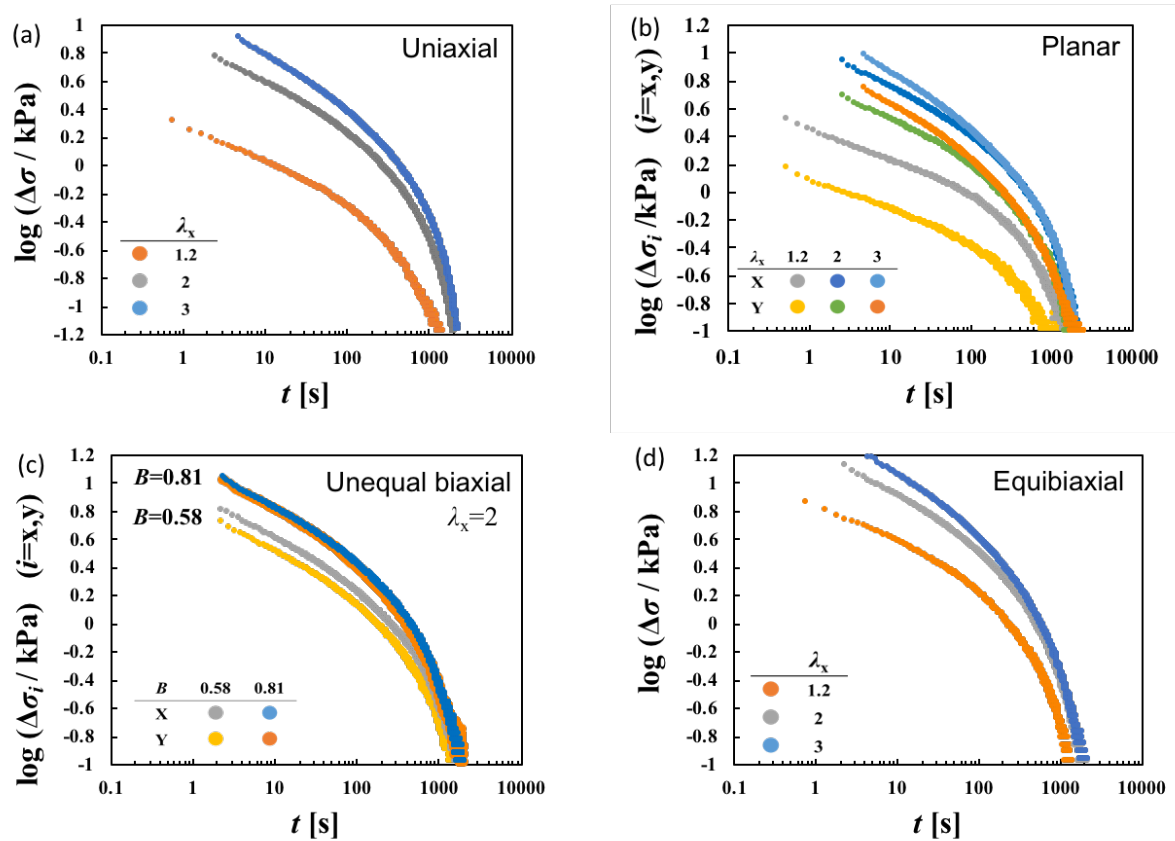

**Figure S1.** Double logarithmic plots of relaxation component ( $\Delta\sigma$ ) versus elapsed time ( $t$ ) for HGG63-0 in (a) uniaxial, (b) planar, (c) unequal biaxial, (d) equibiaxial stretching with various values of  $\lambda_x$ .

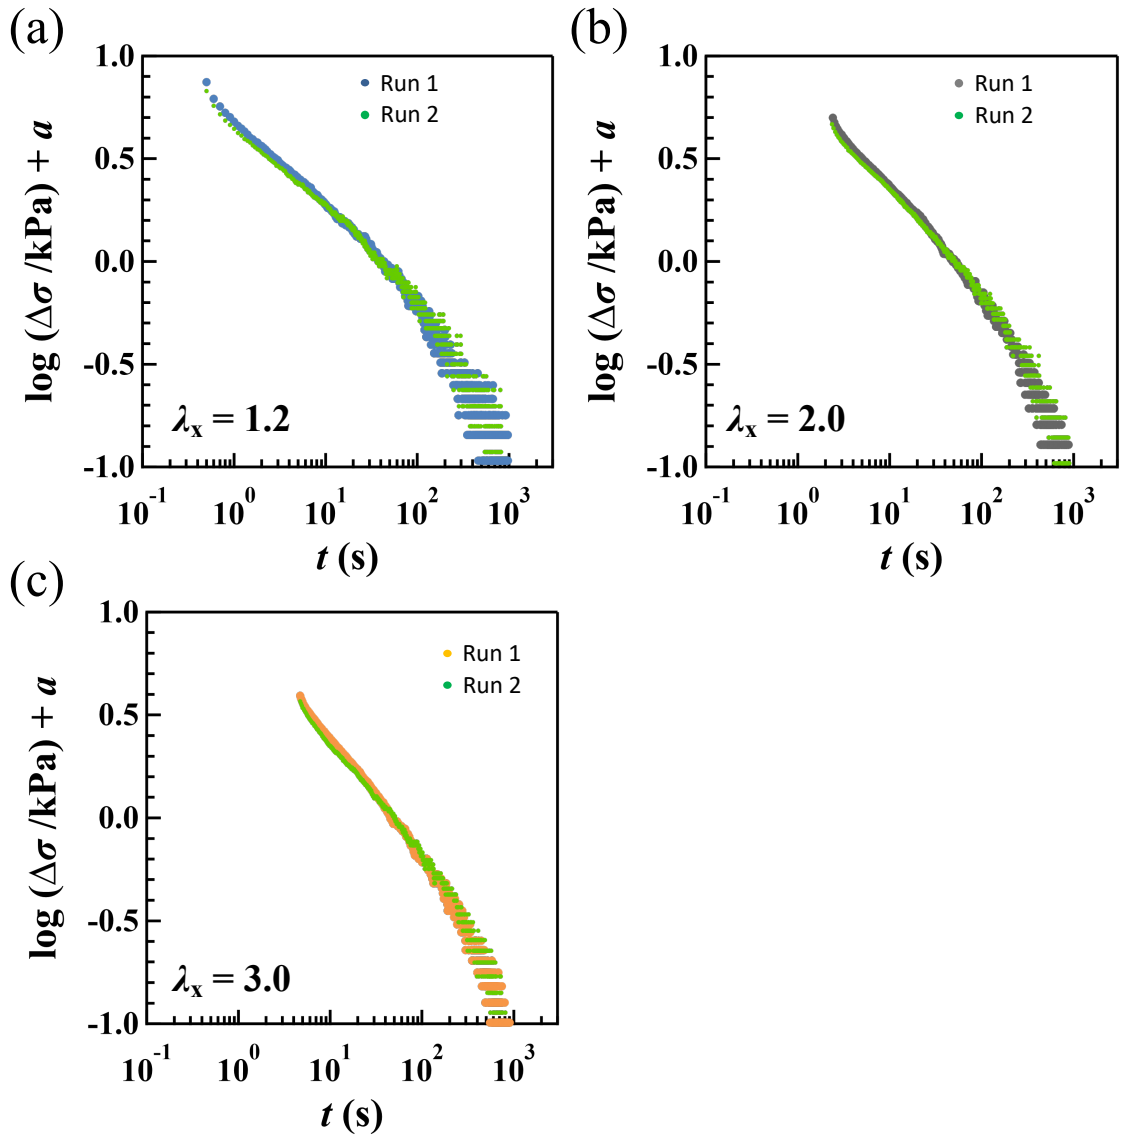

**Figure S2.** The  $\log\Delta\sigma$  -  $\log t$  curves for HGG63-2 in uniaxial stretching with (a)  $\lambda_x = 1.2$ , (b)  $\lambda_x = 2.0$  and (c)  $\lambda_x = 3.0$  obtained by the two independent runs. The two curves in each panel are almost identical, ensuring good reproducibility of the data.

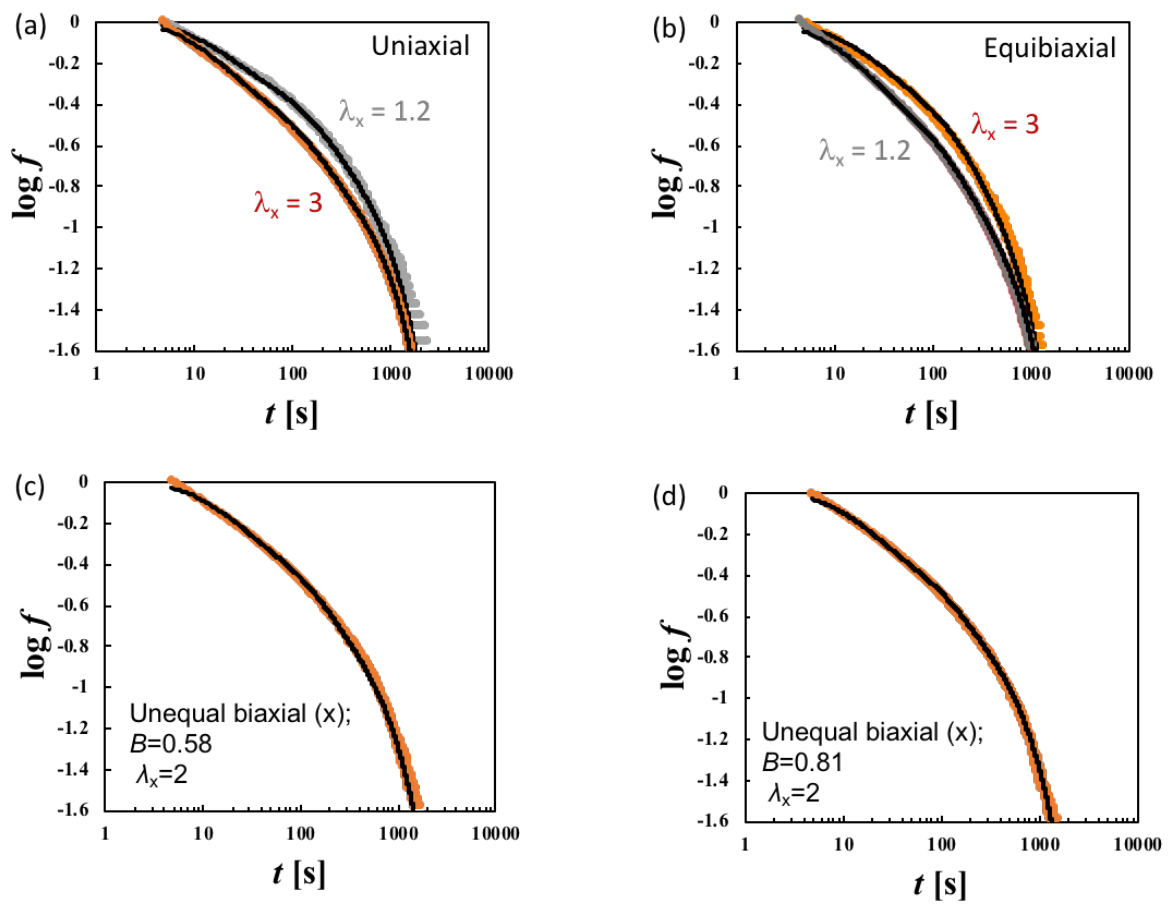

**Figure S3.** Fitting of Eq. (6) (black lines) to the  $\log f$ -  $\log t$  curves in (a) uniaxial, (b) equibiaxial, (c) unequal biaxial ( $B = 0.58$ ) and (d) unequal biaxial ( $B = 0.81$ ) with various values of  $\lambda_x$  for HGG63-0.
